# Supplementary material
Source: PubMed Central journal article supplement (PMC6441631)
Supplement: NIHMS1521913-supplement-1.pdf [file NIHMS1521913-supplement-1.pdf]

## **Supplementary Material**

### **Ambient Temperature and Preterm Birth: A Retrospective Study of 32 Million US Singleton Births**

Shengzhi Sun, Kate R. Weinberger, Keith R. Spangler, Melissa N. Eliot,  
Joseph M. Braun, Gregory A. Wellenius

#### **Table of contents**

**Table S1.** Demographics of 32 million singleton births among 403 US counties from 1989 to 2002.

**Table S2.** Sensitivity analysis by testing different modelling choices for extreme heat and cold.

**Table S3.** Relative risks of preterm birth associated with temperature extremes over the subsequent four days and stratified by preterm birth categories.

**Table S4.** Fraction and number of preterm births attributable to moderate heat.

**Fig. S1.** Flow diagram of birth exclusion in this study.

**Fig. S2.** Daily mean ambient temperature and relative humidity in the contiguous United states, 1989-2002.

**Fig. S3.** Cumulative exposure-response curves for ambient temperature-preterm birth relationships and lag day-specific effects of extreme heat and cold on preterm births.

**Fig. S4.** Sensitivity analysis by testing different modelling choices for cumulative exposure-response curves for ambient temperature-preterm birth relationships.

**Fig. S5.** Cumulative exposure-response curves for ambient temperature-preterm birth relationships for early and late preterm births.

**Table S1. Demographics of 32 million singleton births among 403 US counties from 1989 to 2002.**

| Characteristics, No. (%)                | Preterm Births<br>(20-36 Weeks) | Term Births<br>(37-44 Weeks) | OR for Preterm Birth<br>(95% CI) <sup>a</sup> |
|-----------------------------------------|---------------------------------|------------------------------|-----------------------------------------------|
| Total birth                             | 2,973,909 (9.3)                 | 28,947,137 (90.7)            | —                                             |
| Gestational age, weeks,<br>median (IQR) | 35.0 (3.0)                      | 39.0 (2.0)                   | —                                             |
| Maternal age, years                     |                                 |                              |                                               |
| <25                                     | 1,179,350 (10.7)                | 9,804,132 (89.3)             | 1.34 (1.33, 1.34)                             |
| 25-34                                   | 1,390,758 (8.3)                 | 15,450,201 (91.7)            | 1 [Reference]                                 |
| ≥35                                     | 403,801 (9.9)                   | 3,692,804 (90.1)             | 1.21 (1.21, 1.22)                             |
| Marital status                          |                                 |                              |                                               |
| Married                                 | 1,717,846 (7.8)                 | 20,286,039 (92.2)            | 1 [Reference]                                 |
| Unmarried                               | 1,256,063 (12.7)                | 8,661,098 (87.3)             | 1.71 (1.71, 1.72)                             |
| Maternal race                           |                                 |                              |                                               |
| White                                   | 1,999,007 (8.1)                 | 22,807,833 (91.7)            | 1 [Reference]                                 |
| Nonwhite                                | 974,902 (13.7)                  | 6,139,304 (85.8)             | 1.81 (1.81, 1.82)                             |
| Years of education, years               |                                 |                              |                                               |
| ≤ 8                                     | 227,284 (10.9)                  | 1,852,965 (89.1)             | 1.04 (1.04, 1.04)                             |
| 9-12                                    | 1,571,182 (10.7)                | 13,170,366 (89.3)            | 1 [Reference]                                 |
| 13-17                                   | 1,103,229 (7.7)                 | 13,280,890 (92.3)            | 0.69 (0.68, 0.69)                             |
| Unknown                                 | 72,214 (10.1)                   | 642,916 (89.9)               | 0.95 (0.94, 0.95)                             |
| Smoking during pregnancy                |                                 |                              |                                               |
| No                                      | 1,897,344 (9.1)                 | 18,840,815 (90.9)            | 1 [Reference]                                 |
| Yes                                     | 344,353 (12.1)                  | 2,511,387 (87.9)             | 1.36 (1.35, 1.36)                             |
| Unknown <sup>b</sup>                    | 732,212 (8.8)                   | 7,594,935 (91.2)             | 0.96 (0.96, 0.96)                             |
| Alcohol consumption<br>during pregnancy |                                 |                              |                                               |
| No                                      | 2,264,166 (9.4)                 | 21,807,369 (90.6)            | 1 [Reference]                                 |
| Yes                                     | 51,698 (12.4)                   | 365,439 (87.6)               | 1.37 (1.35, 1.38)                             |
| Unknown <sup>b</sup>                    | 658,045 (8.9)                   | 6,774,329 (91.1)             | 0.94 (0.94, 0.94)                             |
| Parity                                  |                                 |                              |                                               |
| 0                                       | 1,261,636 (9.5)                 | 12,063,405 (90.5)            | 1 [Reference]                                 |
| 1                                       | 849,657 (8.3)                   | 9,352,247 (91.7)             | 0.88 (0.87, 0.88)                             |
| ≥ 2                                     | 850,362 (10.3)                  | 7,428,996 (89.7)             | 1.11 (1.11, 1.11)                             |
| Unknown                                 | 12,254 (10.7)                   | 102,489 (89.3)               | 1.16 (1.14, 1.18)                             |
| Chronic hypertension                    |                                 |                              |                                               |
| No                                      | 2,865,650 (9.2)                 | 28,259,194 (90.8)            | 1 [Reference]                                 |
| Yes                                     | 43,430 (20.9)                   | 163,910 (79.1)               | 2.57 (2.54, 2.59)                             |
| Unknown                                 | 64,829 (11.0)                   | 523,933 (89.0)               | 1.23 (1.22, 1.24)                             |
| Season of conception <sup>c</sup>       |                                 |                              |                                               |
| Spring                                  | 690,569 (9.4)                   | 6,679,003 (90.6)             | 0.98 (0.98, 0.99)                             |
| Summer                                  | 718,648 (9.3)                   | 7,042,737 (90.7)             | 0.97 (0.97, 0.98)                             |
| Fall                                    | 803,703 (9.5)                   | 7,679,851 (90.5)             | 1 [Reference]                                 |
| Winter                                  | 760,989 (9.2)                   | 7,545,546 (90.8)             | 0.96 (0.96, 0.96)                             |
| Geographic Region                       |                                 |                              |                                               |
| Northeast                               | 715,500 (8.8)                   | 7,428,449 (91.2)             | 1.01 (1.01, 1.01)                             |
| Southeast                               | 566,639 (10.8)                  | 4,705,531 (89.2)             | 1.26 (1.25, 1.26)                             |
| Midwest                                 | 591,021 (9.5)                   | 5,655,533 (90.5)             | 1.10 (1.09, 1.10)                             |
| Great Plains                            | 347,421 (10.1)                  | 3,098,420 (89.9)             | 1.19 (1.18, 1.19)                             |

|                   |                |                  |                   |
|-------------------|----------------|------------------|-------------------|
| Northwest         | 74,808 (7.4)   | 932,650 (92.6)   | 0.84 (0.83, 0.84) |
| Southwest         | 678,520 (8.7)  | 7,126,554 (91.3) | 1 [Reference]     |
| Climate Zone      |                |                  |                   |
| Hot-Humid         | 533,446 (10.6) | 4,498,990 (89.4) | 1.26 (1.26, 1.27) |
| Mixed-Humid       | 839,539 (10.0) | 7,532,030 (90.0) | 1.18 (1.18, 1.18) |
| Hot-Dry/Mixed-Dry | 528,042 (9.0)  | 5,313,985 (91.0) | 1.06 (1.05, 1.06) |
| Cold/Very Cold    | 914,837 (8.6)  | 9,664,717 (91.4) | 1 [Reference]     |
| Marine            | 158,045 (7.5)  | 1,937,415 (92.5) | 0.86 (0.86, 0.87) |

Abbreviations: IQR, interquartile range; OR, odds ratio; CI, confidence interval.

— denotes not applicable.

<sup>a</sup> Odds ratios were estimated from crude model that without including any covariates.

<sup>b</sup> Smoking and drinking consumption were not recorded on California birth certificates.

<sup>c</sup> Season of conception: spring (March-May), summer (June-August), fall (September-November), and winter (December-February).

**Table S2. Sensitivity analysis by testing different modelling choices for extreme heat and cold.**

| Modelling choices                | Extreme Heat <sup>b</sup> | Extreme Cold <sup>b</sup> |
|----------------------------------|---------------------------|---------------------------|
| Main model <sup>a</sup>          | 1.025 (1.015, 1.036)      | 0.985 (0.976, 0.993)      |
| DF/year for seasonal control: 6  | 1.022 (1.012, 1.032)      | 0.978 (0.971, 0.986)      |
| DF/year for seasonal control: 10 | 1.033 (1.023, 1.043)      | 0.981 (0.973, 0.990)      |
| DF for relative humidity: 5      | 1.025 (1.015, 1.035)      | 0.984 (0.976, 0.992)      |

Abbreviations: DF, degrees of freedom.

<sup>a</sup>The main model was adjusted for long-term and seasonal trends using a natural cubic spline of time with 8 degrees of freedom per year, relative humidity using a natural cubic spline with 3 degrees of freedom, day of week, federal holidays, and the temporal variation of the daily expected count of preterm births.

<sup>b</sup>Extreme heat and cold were defined as the 95<sup>th</sup> and 5<sup>th</sup> percentiles, respectively, of county-specific temperature distributions over the study period.

**Table S3. Relative risks of preterm birth associated with temperature extremes over the subsequent four days and stratified by preterm birth categories.**

| Preterm birth categories           | Extreme Cold         | Extreme Heat         |
|------------------------------------|----------------------|----------------------|
| Preterm births (20-36 weeks)       | 0.985 (0.976, 0.993) | 1.025 (1.015, 1.036) |
| Early preterm births (20-33 weeks) | 0.979 (0.964, 0.995) | 1.024 (1.006, 1.042) |
| Late preterm births (34-36 weeks)  | 0.985 (0.975, 0.995) | 1.026 (1.015, 1.038) |

Extreme heat and cold were defined as the 95<sup>th</sup> and 5<sup>th</sup> percentiles, respectively, of county-specific temperature distributions over the study period.

**Table S4. Fraction and number of preterm births attributable to moderate heat.**

| Subgroup          | Fraction of Preterm Births<br>% (empirical CI) | Number of Preterm Births<br>per Million Pregnancies<br>No. (empirical CI) |
|-------------------|------------------------------------------------|---------------------------------------------------------------------------|
| All US            | 0.63 (0.49, 0.74)                              | 586 (457, 693)                                                            |
| Geographic Region |                                                |                                                                           |
| Northeast         | 0.43 (0.17, 0.66)                              | 375 (149, 583)                                                            |
| Southeast         | 0.70 (0.48, 0.89)                              | 752 (520, 952)                                                            |
| Midwest           | 0.75 (0.45, 1.03)                              | 709 (424, 970)                                                            |
| Great Plains      | 0.52 (0.13, 0.90)                              | 526 (134, 912)                                                            |
| Northwest         | 0.37 (-0.17, 0.85)                             | 275 (-123, 630)                                                           |
| Southwest         | 0.76 (0.42, 1.08)                              | 662 (364, 936)                                                            |
| Climate Zone      |                                                |                                                                           |
| Hot-Humid         | 0.57 (0.29, 0.84)                              | 608 (311, 886)                                                            |
| Mixed-Humid       | 0.52 (0.27, 0.73)                              | 517 (273, 734)                                                            |
| Hot-Dry/Mixed-Dry | 0.82 (0.41, 1.21)                              | 745 (374, 1,095)                                                          |
| Cold/Very Cold    | 0.72 (0.50, 0.92)                              | 620 (431, 794)                                                            |
| Marine            | 0.26 (-0.10, 0.62)                             | 195 (-79, 466)                                                            |

Abbreviations: CI, confidence interval.

Moderate heat was defined as temperatures between 50<sup>th</sup> and 95<sup>th</sup> percentile of county-specific temperature distributions.

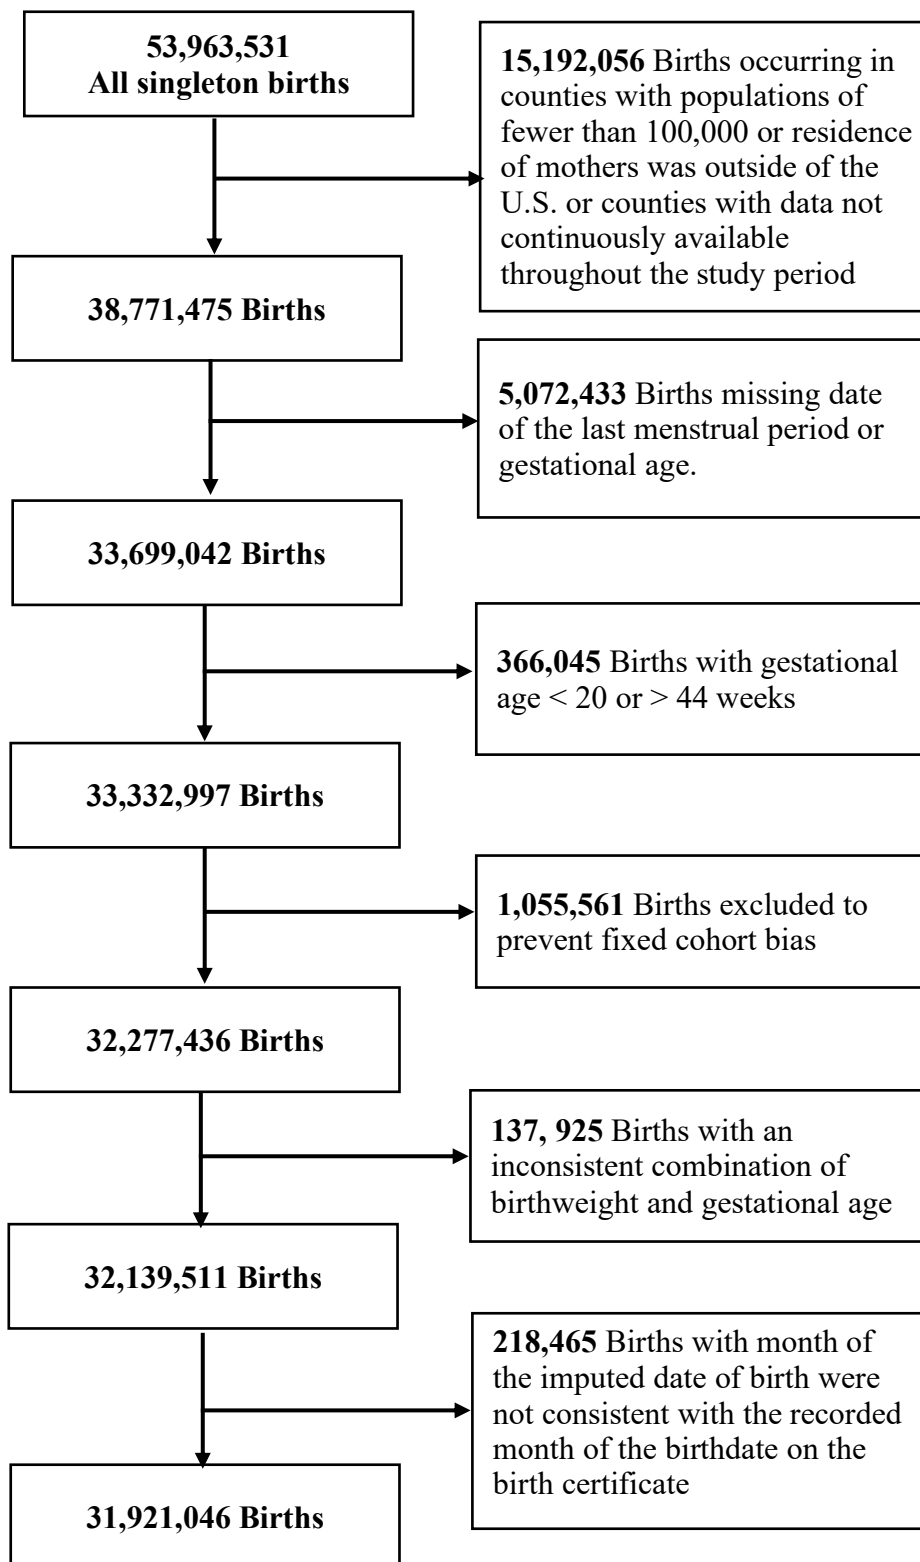

**Fig. S1. Flow diagram of birth exclusion in this study.**

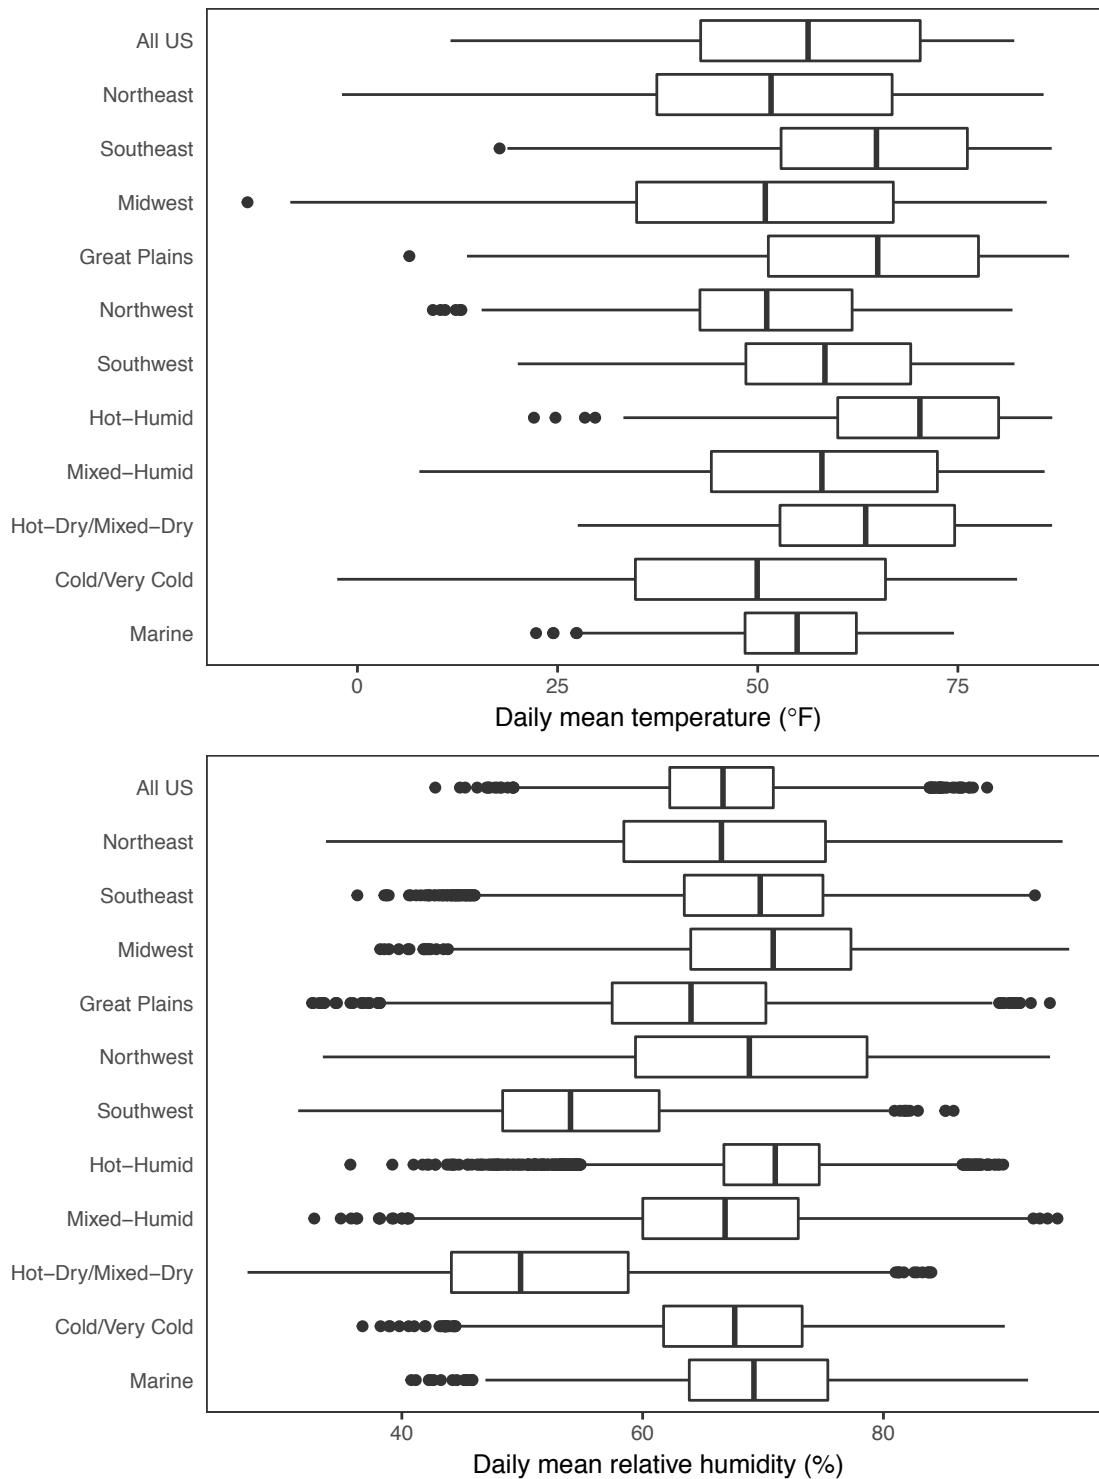

**Fig. S2. Daily mean ambient temperature and relative humidity in the contiguous United States, 1989-2002.**

Boxes of the box plots cover the interquartile ranges with a center line for the median. Whiskers of the box plots extend to the minimum/maximum observations, with outliers shown as dots.



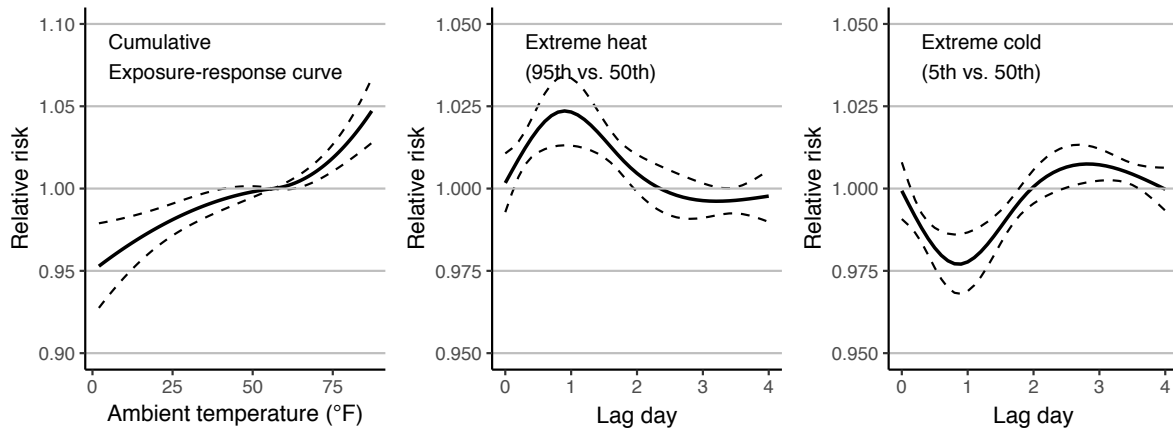

**Fig. S3. Cumulative exposure-response curves for ambient temperature-preterm birth relationships and lag day-specific effects of extreme heat and cold on preterm births.**

Extreme heat and cold were defined as the 95<sup>th</sup> and 5<sup>th</sup> percentiles, respectively, of the county-specific temperature distributions over the study period.

Models were adjusted for long-term and seasonal trends using a natural cubic spline of time with 8 degrees of freedom per year, relative humidity using a natural cubic spline with 3 degrees of freedom, day of the week, federal holidays, and the temporal variation of the daily expected count of preterm births.

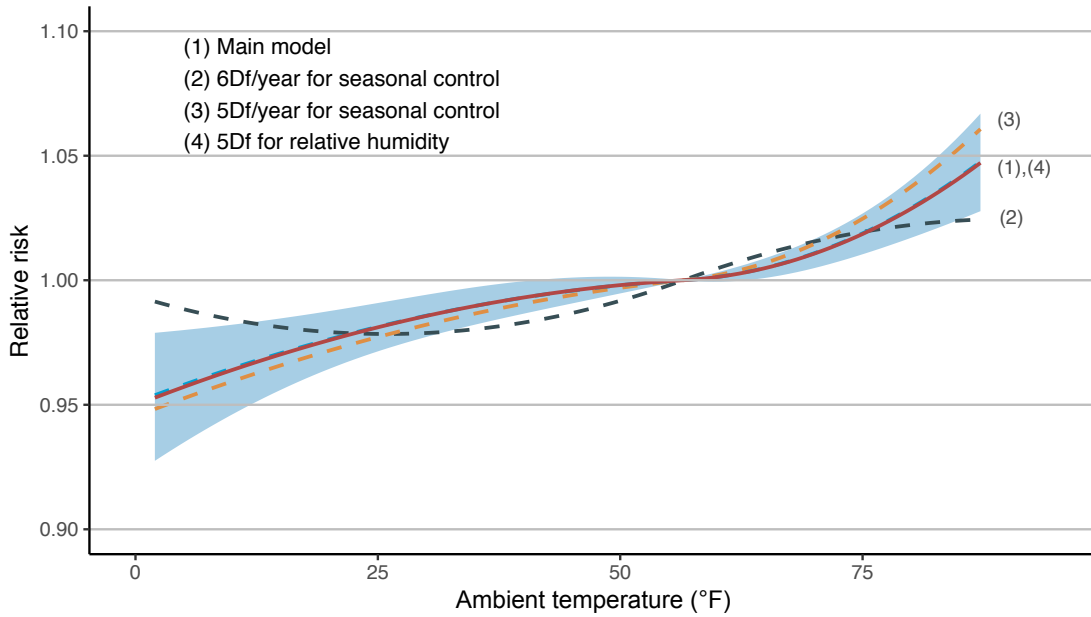

**Fig. S4. Sensitivity analysis by testing different modelling choices for cumulative exposure-response curves for ambient temperature-preterm birth relationships.**

Abbreviations: DF, degrees of freedom.

The blue shaded areas are the 95% CI of the main model (Model 1).

Lines of Model 1 and Model 4 are overlapping.

The main model was adjusted for long-term and seasonal trends using a natural cubic spline of time with 8 degrees of freedom per year, relative humidity using a natural cubic spline with 3 degrees of freedom, day of the week, federal holidays, and the temporal variation of the daily expected count of preterm births.

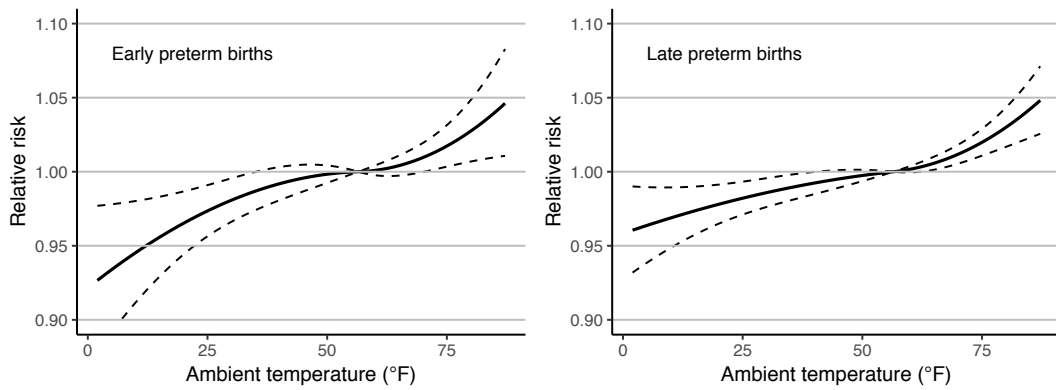

**Fig. S5. Cumulative exposure-response curves for ambient temperature-preterm birth relationships for early and late preterm births.**

We defined early preterm births as births with gestational age ranging from 20 to 33 weeks, while late preterm births as births with gestational age from 34 to 36 weeks.
